# Supplementary material for: What is the prevalence of fear of cancer recurrence in cancer survivors and patients? A systematic review and individual participant data meta‐analysis
Source: PubMed Central journal article supplement — Psychooncology. 2022 Apr 7;31(6):879–92. doi: 10.1002/pon.5921 (PMC9321869; doi:10.1002/pon.5921), 2022-04-07
Supplement: PON-31-879-s001.pdf [file PON-31-879-s001.pdf]

## Appendix A: Joanna Briggs Institute Critical Appraisal Checklist for Studies Reporting Prevalence Data

1. Was the sample frame appropriate to address the target population?
2. Were study participants sampled in an appropriate way?
3. Was the sample size adequate?
4. Were the study subjects and the setting described in detail?
5. Was the response rate adequate, and if not, was the low response rate managed appropriately?

*We have omitted four questions that were not relevant for this study.*

## Appendix B: Risk of bias assessment

|                      | Risk of bias domains |    |    |    |    | Overall |
|----------------------|----------------------|----|----|----|----|---------|
|                      | D1                   | D2 | D3 | D4 | D5 |         |
| Bell (2017)          | +                    | X  | +  | +  | +  | +       |
| Corter (2018)        | +                    | +  | +  | +  | ?  | +       |
| Custers (2015)       | +                    | +  | +  | +  | +  | +       |
| Custers (2016)       | +                    | X  | +  | +  | X  | X       |
| Custers (2017)       | +                    | +  | +  | +  | X  | +       |
| Custers (2018)       | ?                    | X  | +  | X  | ?  | X       |
| Dixon (2019)         | +                    | ?  | +  | +  | ?  | +       |
| Eyrenci (2018)       | +                    | ?  | +  | +  | ?  | +       |
| Guimond (2019)       | +                    | +  | +  | +  | +  | +       |
| Hébert (2017)        | +                    | +  | +  | +  | ?  | +       |
| Jakobsen (2019)      | +                    | +  | +  | +  | +  | +       |
| Jeppesen (2018)      | +                    | +  | +  | +  | X  | +       |
| Kang (2019)          | ?                    | ?  | ?  | ?  | ?  | ?       |
| Lane (2019)          | +                    | X  | +  | +  | ?  | X       |
| Lebel (2016)         | +                    | +  | +  | +  | X  | +       |
| Lim (2019)           | ?                    | ?  | ?  | ?  | ?  | ?       |
| Liu (2017)           | +                    | ?  | +  | +  | X  | X       |
| Mititelu (2016)      | +                    | ?  | +  | +  | ?  | +       |
| Ng (2019)            | +                    | +  | +  | +  | +  | +       |
| Otto (2018)          | +                    | +  | +  | +  | X  | +       |
| Russell (2019)       | +                    | +  | +  | +  | +  | +       |
| Shin (2017)          | +                    | +  | +  | +  | +  | +       |
| Simard (2009)        | +                    | +  | +  | +  | X  | +       |
| Simard (2010)        | +                    | X  | +  | +  | X  | X       |
| Sukyati (2019)       | +                    | ?  | +  | ?  | ?  | ?       |
| van de Wal (2016)    | X                    | +  | +  | +  | X  | X       |
| Van der Gucht (2017) | +                    | X  | X  | +  | ?  | X       |
| van Helmond (2017)   | +                    | +  | +  | +  | ?  | +       |
| van Helmond (2020)   | +                    | +  | +  | +  | X  | +       |
| Vatandoust (2019)    | ?                    | ?  | X  | ?  | +  | ?       |
| Wijayanti (2018)     | +                    | +  | +  | X  | +  | +       |
| Zdenkowski (2018)    | ?                    | +  | +  | +  | +  | +       |

Study

Judgement  
 No  
 Yes  
 Unclear

a)

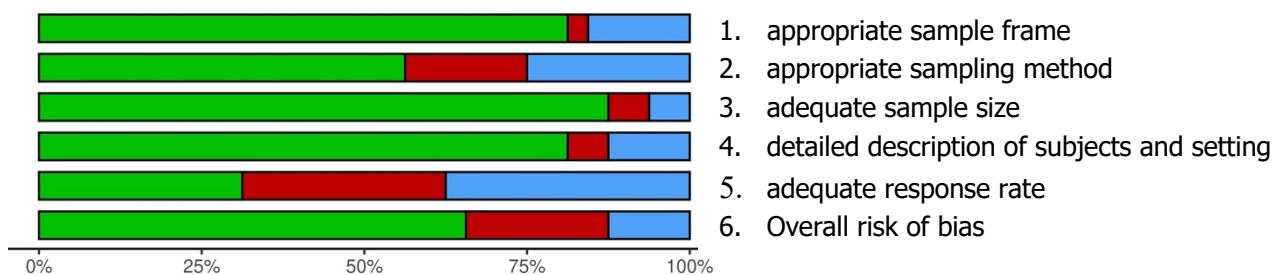

b)

Figure 1. Risk of bias assessment of studies that provided data and did not select on level of FCR, a) shows assessment per study, b) shows a summary of all studies. Figure created using robvis (95).

| Study                 | Risk of bias domains |    |    |    |    | Overall |
|-----------------------|----------------------|----|----|----|----|---------|
|                       | D1                   | D2 | D3 | D4 | D5 |         |
| Compen (2018)         | ⊗                    | ⊗  | ⊕  | ⊕  | ?  | ⊗       |
| Dirkse (2019)         | ⊗                    | ⊗  | ⊕  | ⊕  | ?  | ⊗       |
| Fisher (2017)         | ⊗                    | ⊗  | ⊗  | ⊕  | ?  | ⊗       |
| Fisher (2019)         | ⊗                    | ⊗  | ⊗  | ⊕  | ?  | ⊗       |
| Jakobsen (2018)       | ⊗                    | ⊕  | ⊕  | ⊕  | ⊕  | ⊕       |
| Johns (2020)          | ⊗                    | ⊗  | ⊕  | ⊕  | ⊗  | ⊗       |
| Luigjes-Huizer (2019) | ?                    | ?  | ?  | ?  | ?  | ?       |
| Maheu (2016)          | ⊗                    | ⊗  | ⊕  | ⊕  | ⊕  | ⊗       |
| Murphy (2019)         | ⊗                    | ⊗  | ⊕  | ⊕  | ?  | ⊗       |
| Savard (2013)         | ⊗                    | ⊕  | ⊕  | ⊕  | ⊕  | ⊕       |
| Savard (2018)         | ⊗                    | ⊗  | ⊕  | ⊕  | ?  | ⊗       |
| Van De Wal (2017)     | ⊗                    | ⊗  | ⊕  | ⊕  | ⊗  | ⊗       |

Judgement  
 ⊗ No  
 ⊕ Yes  
 ? Unclear

a)

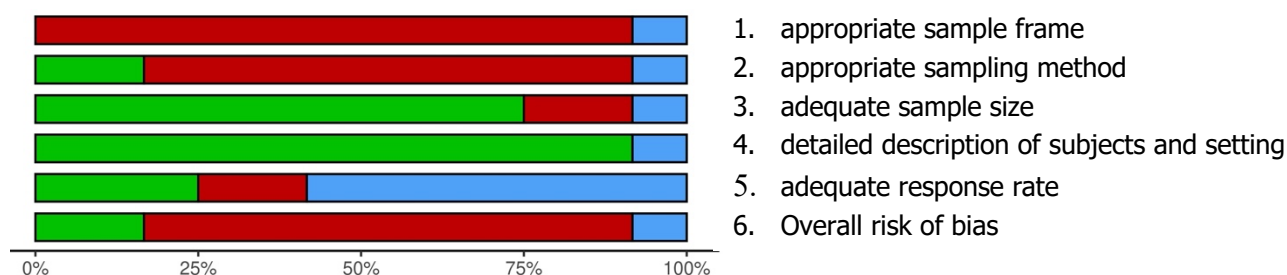

b)

Figure 2. Risk of bias assessment of studies that provided data and selected on level of FCR, a) shows assessment per study, b) shows a summary of all studies. Figure created using robvis (95)

| Study            | Risk of bias domains |    |    |    |    | Overall |
|------------------|----------------------|----|----|----|----|---------|
|                  | D1                   | D2 | D3 | D4 | D5 |         |
| Dodds (2015)     | +                    | X  | +  | +  | ?  | X       |
| Kasparian (2016) | +                    | ?  | X  | +  | +  | X       |
| Merckaert (2017) | +                    | X  | +  | +  | X  | X       |
| Smith (2019)     | X                    | +  | +  | +  | X  | X       |
| Galica (2020)    | +                    | X  | X  | +  | ?  | X       |
| Galica (2018)    | +                    | +  | +  | +  | +  | +       |
| Nelson (2018)    | +                    | +  | +  | +  | +  | +       |
| Walburg (2019)   | +                    | +  | +  | +  | +  | +       |
| Costa (2016)     | +                    | +  | +  | +  | +  | +       |
| Batani (2019)    | +                    | +  | +  | +  | ?  | +       |
| Leclair (2019)   | +                    | +  | +  | +  | ?  | +       |
| Peng (2019)      | +                    | +  | +  | +  | ?  | +       |
| Shin (2020)      | +                    | +  | +  | +  | ?  | +       |
| Tesson (2017)    | +                    | +  | +  | +  | ?  | +       |
| Dieng (2016)     | +                    | X  | +  | +  | +  | +       |
| Hong (2020)      | +                    | ?  | +  | +  | ?  | +       |
| Thewes (2012)    | +                    | +  | +  | +  | X  | +       |
| Van Liew (2014)  | X                    | +  | +  | +  | +  | +       |
| Petzel (2012)    | ?                    | ?  | ?  | ?  | ?  | ?       |
| Herman (2014)    | ?                    | ?  | ?  | ?  | ?  | ?       |
| Shun (2018)      | X                    | ?  | +  | ?  | ?  | ?       |

Judgement  
 X No  
 + Yes  
 ? Unclear

a)

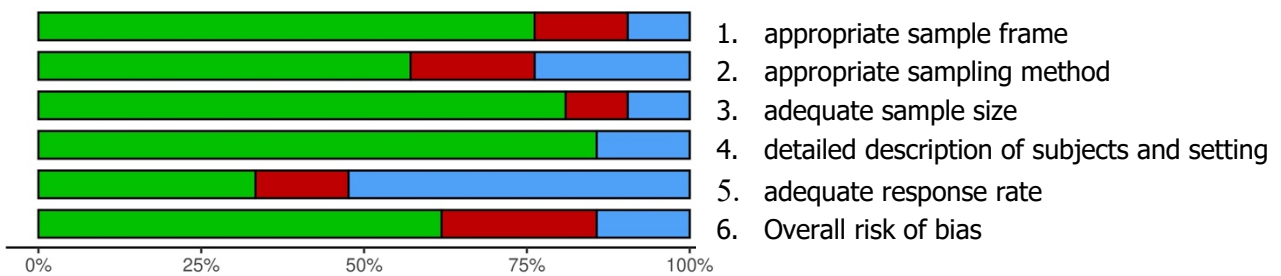

b)

Figure 3. Risk of bias assessment of studies that were included in the aggregate data analysis, a) shows assessment per study, b) shows a summary of all studies. Figure created using robvis (95).

## Appendix C: Main characteristics and mean FCR scores per dataset

a) Datasets that did not select participants based on their level of fear of cancer recurrence or related factors.

| Author   | year        | n    | FCR severity<br>mean (sd) | Mean age<br>(yrs) | Country         | Language  | Sex     |           | Cancer type        | Patients<br>(n) | Survivors<br>(n) | Mean time since<br>cancer diagnosis<br>(yrs) |
|----------|-------------|------|---------------------------|-------------------|-----------------|-----------|---------|-----------|--------------------|-----------------|------------------|----------------------------------------------|
|          |             |      |                           |                   |                 |           | men (n) | women (n) |                    |                 |                  |                                              |
| Bell     | 2017        | 215  | 15.3 (6.8)                | 65                | Australia       | English   | 137     | 78        | melanoma           | 0               | 215              | 1.3                                          |
| Corter   | 2018        | 125  | 17.2 (7.6)                | 56                | New Zealand     | English   | 0       | 125       | breast             | 0               | 125              | 0.4                                          |
| Custers  | 2015        | 54   | 16.9 (7.7)                | 62                | the Netherlands | Dutch     | 29      | 25        | other              | 54              | 0                | 4.8                                          |
| Custers  | 2017        | 460  | 16 (6.8)                  | 57                | the Netherlands | Dutch     | 0       | 460       | breast             | 0               | 460              | 2.8                                          |
| Custers  | 2016        | 76   | 11.6 (7.3)                | 67                | the Netherlands | Dutch     | 40      | 36        | colorectal         | 0               | 76               | 5.0                                          |
| Custers  | 2018        | 150  | 13.2 (6.4)                | 68                | the Netherlands | Dutch     | 97      | 53        | colorectal         | 150             | 0                | 0.0                                          |
| Dixon    | 2019        | 97   | 24.3 (6.8)                | -                 | USA             | English   | 33      | 64        | breast, lung       | 0               | 97               | -                                            |
| Eyrenci  | 2018        | 217  | 15.3 (7.4)                | 51                | Turkey          | Turkish   | 43      | 174       | multiple           | 0               | 217              | 4.5                                          |
| Galica   | <i>n.p.</i> | 219  | 17.3 (7.9)                | 64                | Canada          | English   | 40      | 178       | breast, colorectal | 0               | 219              | -                                            |
| Guimond  | 2019        | 81   | 11.5 (5.8)                | 59                | Canada          | French    | 0       | 81        | breast             | 81              | 0                | 0.3                                          |
| Hebert   | 2017        | 38   | 14.2 (6.6)                | 69                | Canada          | French    | 0       | 38        | endometrial        | 38              | 0                | -                                            |
| Jakobsen | 2019        | 141  | 11.7 (6.3)                | 66                | Denmark         | Danish    | 100     | 41        | colorectal         | 0               | 93               | 1.1                                          |
| Jeppesen | 2018        | 212  | 10.4 (7.1)                | 65                | Denmark         | Danish    | 0       | 212       | endometrial        | 0               | 212              | 0.0                                          |
| Kang     | 2019        | 52   | 12.7 (6.5)                | 63                | Canada          | English   | 52      | 0         | prostate cancer    | 52              | 0                | 1.9                                          |
| Lane     | 2019        | 554  | 22.8 (7)                  | 34                | Canada          | English   | 72      | 482       | multiple           | 37              | 301              | 4.9                                          |
| Lebel    | 2016        | 350  | 13.8 (7.9)                | 67                | Canada          | English   | 185     | 165       | multiple           | 2               | 295              | 5.9                                          |
| Lim      | 2019        | 125  | 10.9 (6.7)                | 59                | South Korea     | Korean    | 80      | 45        | colorectal         | 125             | 0                | -                                            |
| Liu      | 2017        | 405  | 13.1 (6.7)                | 56                | Singapore       | English   | 81      | 324       | multiple           | 0               | 405              | -                                            |
| Mititelu | 2016        | 32   | 16.5 (6.5)                | -                 | Canada          | English   | 3       | 29        | multiple           | 4               | 13               | 2.2                                          |
| Ng       | 2019        | 293  | 10.8 (7.2)                | 60                | Hong Kong       | Cantonese | 76      | 217       | breast, colorectal | 0               | 293              | 0.0                                          |
| Otto     | 2018        | 300  | 15 (7.8)                  | 62                | USA             | English   | 0       | 300       | breast             | 0               | 300              | 3.5                                          |
| Russell  | 2019        | 69   | 16.8 (7.3)                | 53                | Australia       | English   | 32      | 37        | melanoma           | 0               | 69               | 3.9                                          |
| Shin     | 2017        | 239  | 15.1 (7.2)                | 50                | South Korea     | Korean    | 71      | 168       | multiple           | 239             | 0                | 0.0                                          |
| Simard   | 2009        | 1984 | 12.9 (6.9)                | 63                | Canada          | French    | 904     | 1080      | multiple           | 575             | 1390             | 4.2                                          |

|               |             |     |            |    |                 |           |     |     |                |     |     |     |
|---------------|-------------|-----|------------|----|-----------------|-----------|-----|-----|----------------|-----|-----|-----|
| Simard        | 2010        | 600 | 12.9 (6.8) | 64 | Canada          | French    | 319 | 281 | multiple       | 451 | 149 | 4.7 |
| Sukyati       | 2019        | 114 | 12.2 (7.9) | 52 | Indonesia       | Indonesia | 0   | 114 | other          | 114 | 0   | -   |
| Tauber        | <i>n.p.</i> | 780 | 15.2 (7.3) | -  | Denmark         | Danish    | 0   | 780 | breast         | 0   | 780 | -   |
| Van de Wal    | 2016        | 311 | 10.7 (7.1) | 70 | the Netherlands | Dutch     | 311 | 0   | prostate       | 0   | 311 | 8.3 |
| van der Gucht | 2017        | 11  | 20.6 (8.1) | 21 | Belgium         | Dutch     | 6   | 5   | leukemia, lung | 0   | 11  | 6.0 |
| van Helmond   | 2020        | 454 | 13.9 (6.9) | 58 | the Netherlands | Dutch     | 0   | 454 | breast         | 0   | 454 | 2.6 |
| van Helmond   | 2017        | 290 | 18.8 (5.1) | 52 | the Netherlands | Dutch     | 39  | 251 | -              | 0   | 290 | -   |
| Vatandoust    | 2019        | 51  | 12.1 (6.6) | 64 | Australia       | English   | 36  | 15  | colorectal     | 0   | 51  | 4.7 |
| Wijayanti     | 2018        | 153 | 18.9 (5.2) | 52 | Indonesia       | Indonesia | 0   | 153 | other          | 153 | 0   | -   |
| Zdenkowski    | 2018        | 59  | 15.5 (6.1) | 52 | Australia       | English   | 0   | 59  | breast         | 0   | 59  | 0.0 |

b) Datasets that did select participants based on their level of fear of cancer recurrence or related factors.

| Author         | year | n   | FCR severity mean (sd) | Mean age (yrs) | Country         | Language | Sex     |           | Cancer type         | Patients (n) | Survivors (n) | Mean time since cancer diagnosis (yrs) |
|----------------|------|-----|------------------------|----------------|-----------------|----------|---------|-----------|---------------------|--------------|---------------|----------------------------------------|
|                |      |     |                        |                |                 |          | men (n) | women (n) |                     |              |               |                                        |
| Compen         | 2018 | 245 | 21.3 (6.5)             | 52             | the Netherlands | Dutch    | 35      | 210       | multiple            | -            | -             | 3.5                                    |
| Dirkse         | 2020 | 83  | 21.5 (5)               | 51             | Canada          | English  | 14      | 69        | multiple            | 0            | 83            | 2.1                                    |
| Fisher         | 2019 | 27  | 25.6 (7.6)             | 51             | United Kingdom  | English  | 3       | 24        | multiple            | 0            | 27            | -                                      |
| Fisher         | 2017 | 4   | 30.3 (4.9)             | NA             | United Kingdom  | English  | 0       | 4         | breast, endometrial | 0            | 4             | 2.1                                    |
| Jakobsen       | 2018 | 69  | 12.4 (7)               | 67             | Denmark         | Danish   | 39      | 30        | colorectal          | 0            | 31            | 1.9                                    |
| Johns          | 2020 | 91  | 19 (5.6)               | 58             | USA             | English  | 0       | 91        | breast              | 0            | 91            | 5.1                                    |
| Luigjes-Huizer | 2019 | 58  | 17.6 (7.3)             | 64             | the Netherlands | Dutch    | 21      | 26        | multiple            | 0            | 58            | 6.9                                    |
| Maheu          | 2016 | 136 | 23.1 (5.4)             | 56             | Canada          | English  | 0       | 136       | multiple            | 0            | 136           | 2.2                                    |
| Murphy         | 2020 | 114 | 22.4 (5.7)             | 53             | Australia       | English  | 13      | 101       | multiple            | -            | -             | 4.0                                    |
| Savard         | 2013 | 962 | 14.3 (6.9)             | 57             | Canada          | French   | 343     | 619       | multiple            | 962          | 0             | 0.2                                    |
| Savard         | 2018 | 38  | 21.4 (5.6)             | 57             | Canada          | French   | 2       | 36        | multiple            | 9            | 16            | 1.1                                    |
| Van de Wal     | 2017 | 88  | 19.3 (7.2)             | 59             | the Netherlands | Dutch    | 41      | 47        | multiple            | 0            | 88            | 2.6                                    |

## Appendix D: Characteristics of FCR severity groups, according to different cutoffs.

For these analyses, 12 additional studies were included, that had selected participants based on the severity of their FCR. The mean FCR severity score for these additional studies was 20.7.

|                                 | < 13      |          | 13-15     |          | 16-21     |          | ≥22       |          |
|---------------------------------|-----------|----------|-----------|----------|-----------|----------|-----------|----------|
|                                 | Survivors | Patients | Survivors | Patients | Survivors | Patients | Survivors | Patients |
| <b>Sex</b>                      |           |          |           |          |           |          |           |          |
| Men                             | 1150 (39) | 512 (40) | 279 (28)  | 168 (34) | 475 (23)  | 216 (27) | 302 (17)  | 133 (23) |
| Women                           | 1817 (61) | 778 (60) | 702 (72)  | 332 (66) | 1581 (77) | 575 (73) | 1484 (83) | 455 (77) |
| <b>Age groups</b>               |           |          |           |          |           |          |           |          |
| 18-29 years                     | 19 (1)    | 9 (1)    | 12 (1)    | 4 (1)    | 55 (3)    | 10 (1)   | 84 (5)    | 17 (3)   |
| 30-44 years                     | 157 (5)   | 100 (8)  | 108 (11)  | 57 (11)  | 274 (14)  | 94 (12)  | 431 (25)  | 110 (19) |
| 45-59 years                     | 753 (26)  | 468 (36) | 367 (38)  | 218 (44) | 793 (40)  | 365 (46) | 628 (37)  | 262 (45) |
| 60-74 years                     | 1505 (52) | 600 (47) | 384 (40)  | 200 (40) | 733 (37)  | 282 (36) | 481 (28)  | 178 (30) |
| ≥75 years                       | 474 (16)  | 113 (9)  | 92 (10)   | 20 (4)   | 127 (6)   | 36 (5)   | 71 (4)    | 20 (3)   |
| <b>Cancer type</b>              |           |          |           |          |           |          |           |          |
| Breast cancer                   | 1368 (47) | 534 (41) | 536 (57)  | 223 (44) | 1148 (60) | 385 (49) | 1025 (61) | 263 (45) |
| Colon and rectal cancer         | 373 (13)  | 235 (18) | 102 (11)  | 56 (11)  | 171 (9)   | 112 (14) | 133 (8)   | 61 (11)  |
| Endometrial cancer              | 123 (4)   | 59 (5)   | 25 (3)    | 32 (6)   | 38 (2)    | 33 (4)   | 33 (2)    | 28 (5)   |
| Leukemia & non-hodgkin lymphoma | 19 (1)    | 1 (0)    | 13 (1)    | 1 (0)    | 34 (2)    | 3 (0)    | 42 (2)    | 9 (2)    |
| Lung cancer                     | 57 (2)    | 35 (3)   | 16 (2)    | 18 (4)   | 36 (2)    | 39 (5)   | 73 (4)    | 23 (4)   |
| Melanoma                        | 89 (3)    | 0 (0)    | 42 (4)    | 0 (0)    | 91 (5)    | 0 (0)    | 71 (4)    | 3 (0)    |
| Prostate cancer                 | 754 (26)  | 289 (22) | 151 (16)  | 105 (21) | 218 (11)  | 99 (13)  | 101 (6)   | 65 (11)  |
| Thyroid cancer                  | 4 (0)     | 0 (0)    | 8 (1)     | 0 (0)    | 9 (0)     | 3 (0)    | 25 (1)    | 5 (1)    |
| Other cancer types              | 123 (4)   | 137 (11) | 46 (5)    | 64 (13)  | 165 (9)   | 117 (15) | 177 (11)  | 131 (22) |
| <b>Time since diagnosis</b>     |           |          |           |          |           |          |           |          |
| 0-1 years                       | 779 (33)  | 764 (69) | 262 (35)  | 290 (67) | 514 (35)  | 440 (65) | 486 (37)  | 304 (60) |
| 2-5 years                       | 1098 (47) | 246 (22) | 347 (46)  | 107 (25) | 686 (46)  | 160 (24) | 581 (44)  | 142 (28) |
| 6-10 years                      | 328 (14)  | 69 (6)   | 100 (13)  | 23 (5)   | 203 (14)  | 50 (7)   | 174 (13)  | 41 (8)   |
| >10 years                       | 153 (6)   | 26 (2)   | 40 (5)    | 12 (3)   | 83 (6)    | 26 (4)   | 76 (6)    | 16 (3)   |

A partially imputed dataset was used: the variables FCR severity, age, cancer type and time since cancer diagnosis were not imputed, since the imputation did not converge.
